# Supplementary material for: Synthetic Inhibitors of Snake Venom Enzymes: Thioesters Derived from 2-Sulfenyl Ethylacetate
Source: PubMed Central journal article supplement (PMC6630910; doi:10.3390/ph12020080), 2019-05-23
Supplement: pharmaceuticals-12-00080-s001.pdf [file pharmaceuticals-12-00080-s001.pdf]

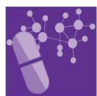

Article

# Synthetic Inhibitors of Snake Venom Enzymes: Thioesters Derived From 2-Sulfenyl Ethylacetate

Isabel C. Henao Castañeda <sup>1,\*</sup>, Jaime A. Pereañez <sup>2</sup> and Lina M. Preciado <sup>2</sup>

---

## SUPPLEMENTARY MATERIAL

Figure S1. <sup>1</sup>H NMR Spectrum Ethyl 2-((4-chlorobenzoyl)thio)acetate (I)

Figure S2. <sup>13</sup>C NMR Spectrum Ethyl 2-((4-chlorobenzoyl)thio)acetate (I)

Figure S3. <sup>1</sup>H NMR Spectrum Ethyl 2-((3-nitrobenzoyl)thio)acetate (II)

Figure S4. <sup>13</sup>C NMR Spectrum Ethyl 2-((3-nitrobenzoyl)thio)acetate (II)

Figure S5. <sup>1</sup>H NMR Spectrum Ethyl 2-((4-nitrobenzoyl)thio)acetate (III)

Figure S6. <sup>13</sup>C NMR Spectrum Ethyl 2-((4-nitrobenzoyl)thio)acetate (III)

Figure S7. GC-MS Ethyl 2-((4-chlorobenzoyl)thio)acetate (I)

Figure S8. GC-MS Ethyl 2-((3-nitrobenzoyl)thio)acetate (II)

Figure S9. GC-MS Ethyl 2-((4-nitrobenzoyl)thio)acetate (III)

Figure S10. IR Ethyl 2-((4-chlorobenzoyl)thio)acetate (I)

Figure S11. IR Ethyl 2-((3-nitrobenzoyl)thio)acetate (II)

Figure S12. IR Ethyl 2-((4-nitrobenzoyl)thio)acetate (III)

Figure S1. <sup>1</sup>H NMR Spectrum Ethyl 2-((4-chlorobenzoyl)thio)acetate (I)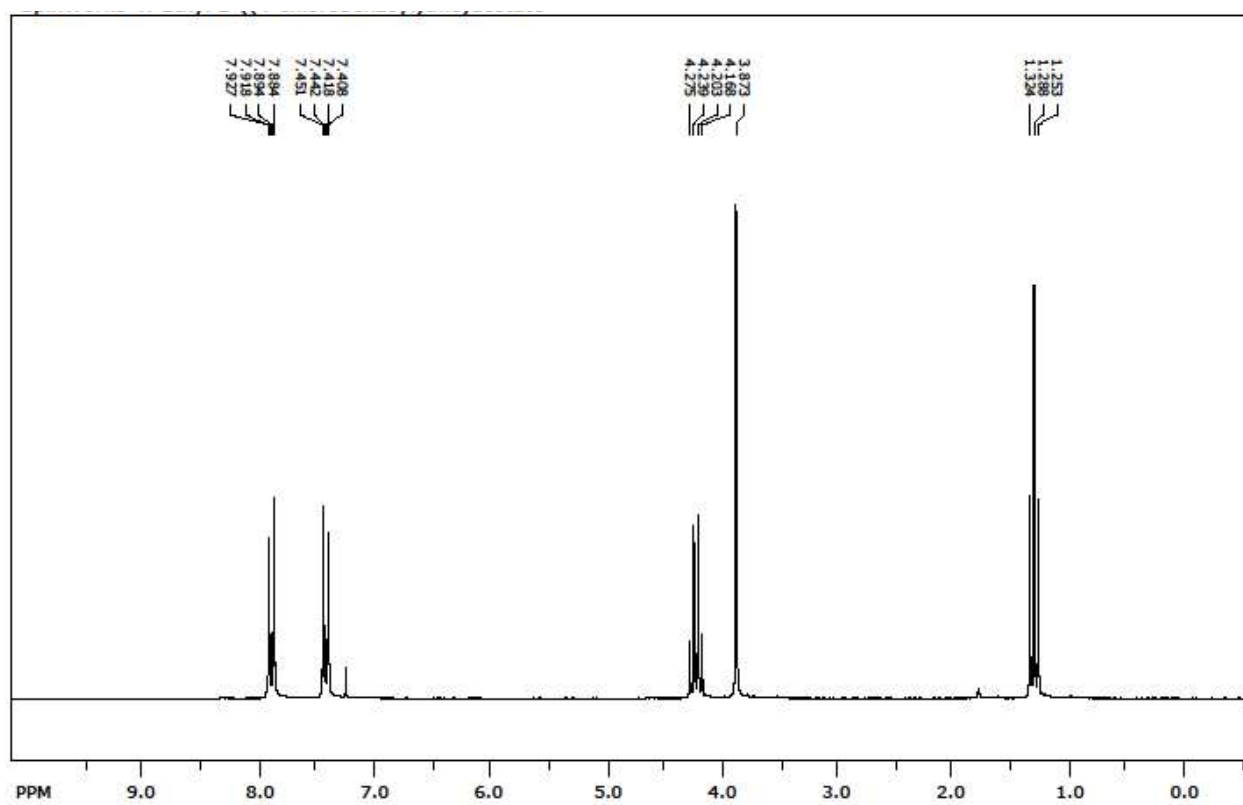Figure S2. <sup>13</sup>C NMR Spectrum Ethyl 2-((4-chlorobenzoyl)thio)acetate (I)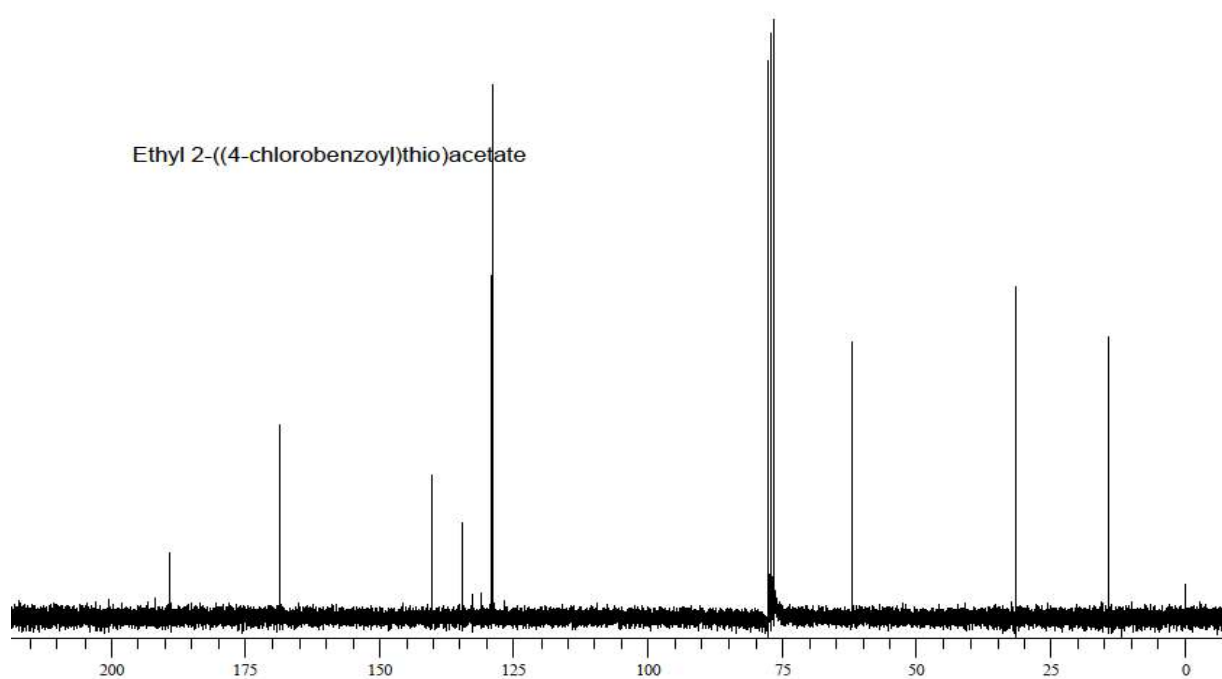

**Figure S3.  $^1\text{H}$  NMR Spectrum Ethyl 2-((3-nitrobenzoyl)thio)acetate (II)**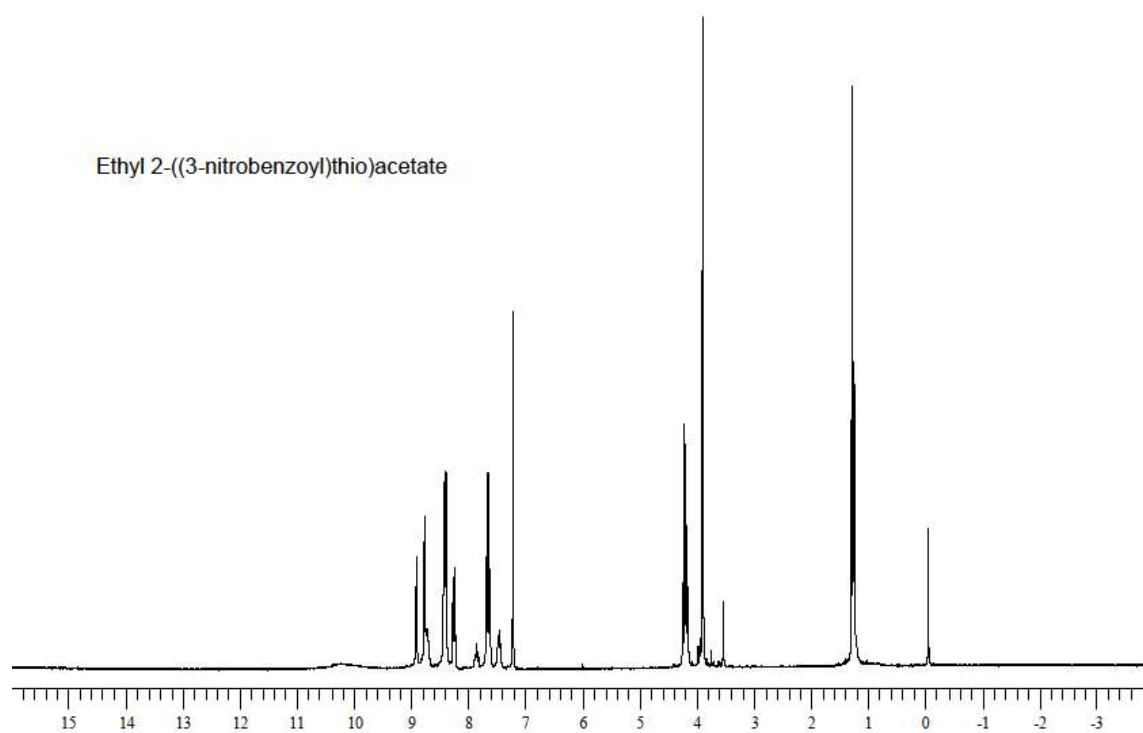**Figure S4.  $^{13}\text{C}$  NMR Spectrum Ethyl 2-((3-nitrobenzoyl)thio)acetate (II)**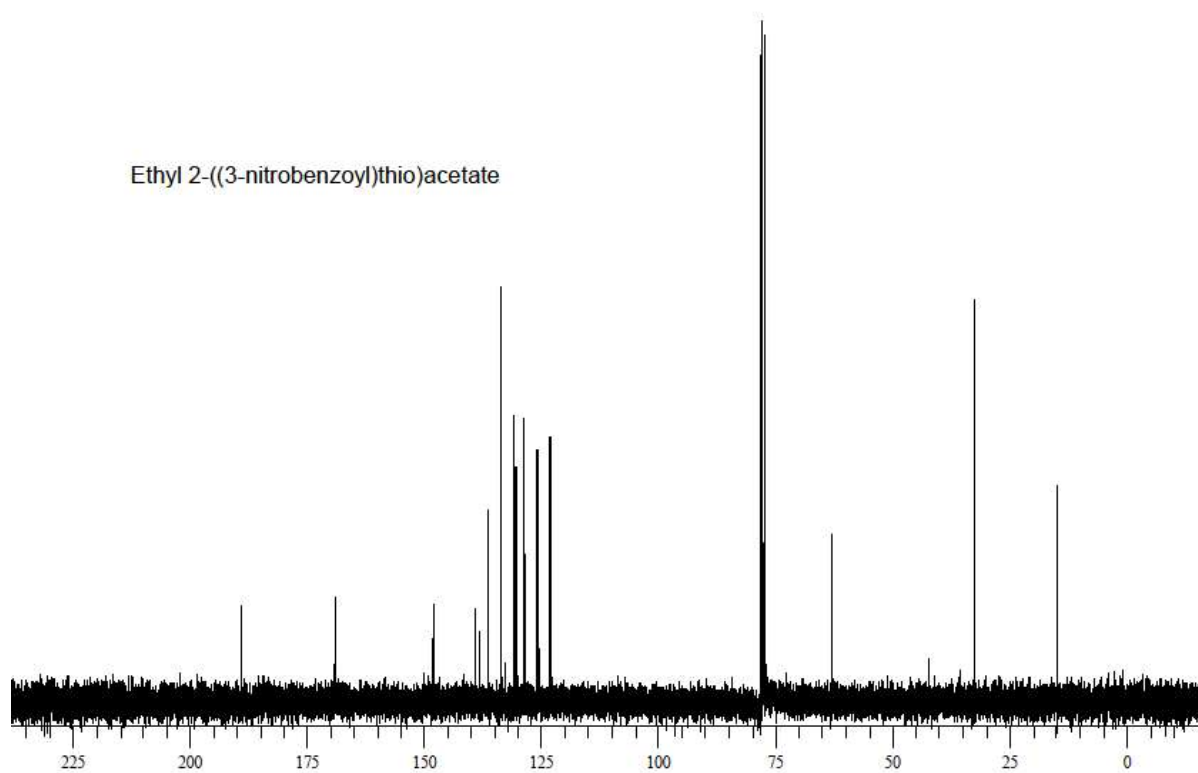

**Figure S5.  $^1\text{H}$  NMR Spectrum Ethyl 2-((4-nitrobenzoyl)thio)acetate (III)**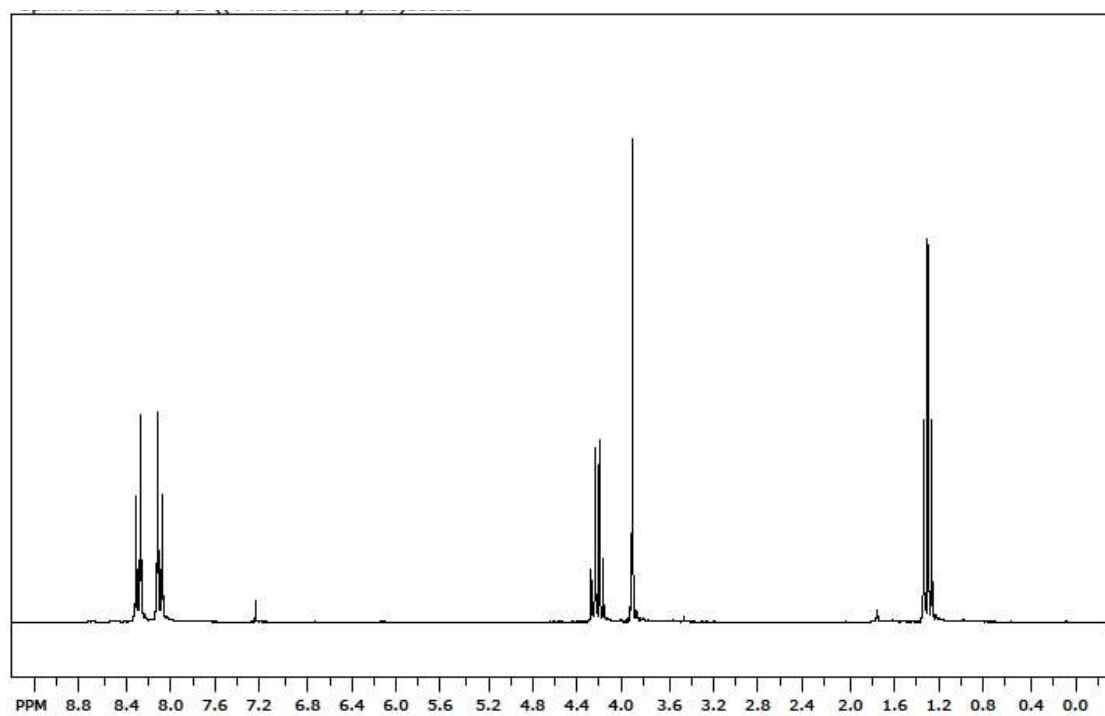**Figure S6.  $^{13}\text{C}$  NMR Spectrum Ethyl 2-((4-nitrobenzoyl)thio)acetate (III)**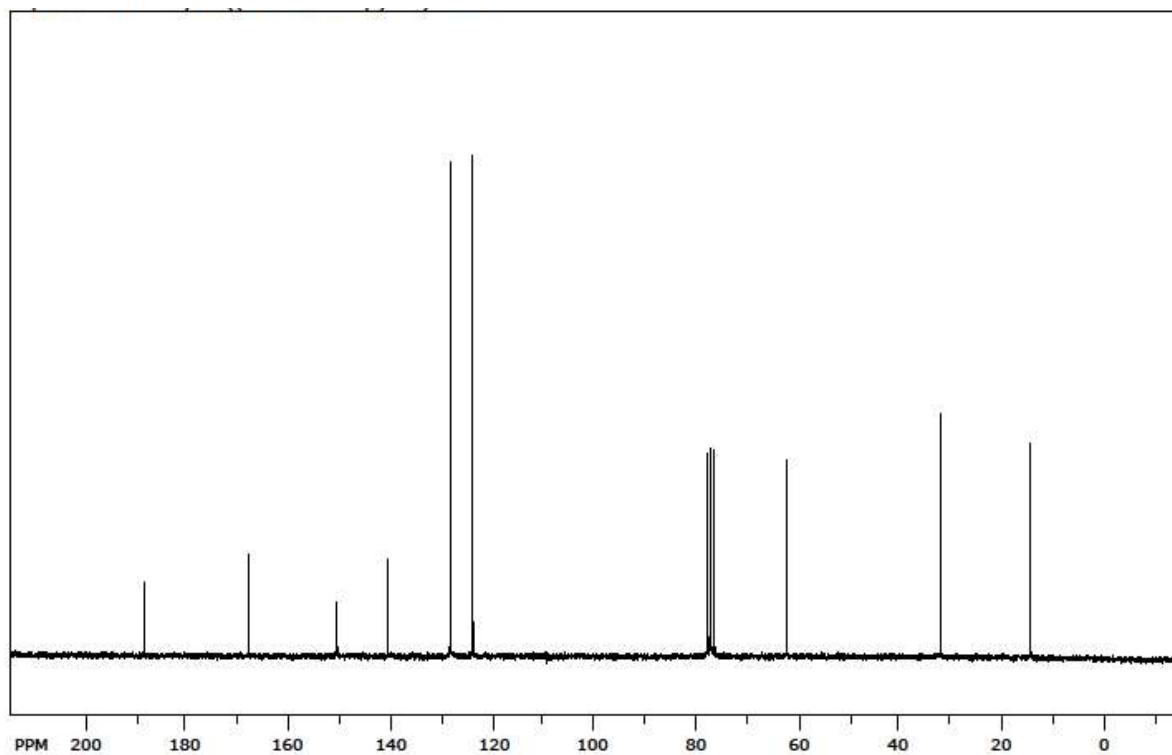

Figure S7. GC-MS Ethyl 2-((4-chlorobenzoyl)thio)acetate (I)

## Ethyl 2-((4-chlorobenzoyl)thio)acetate

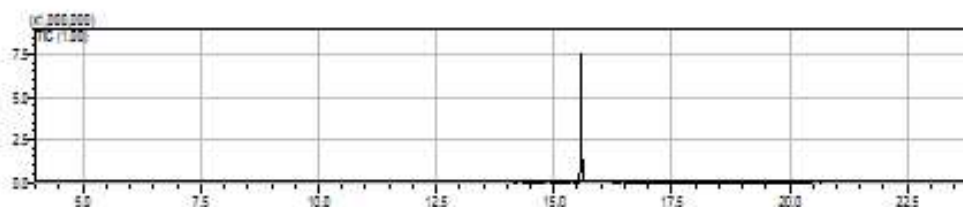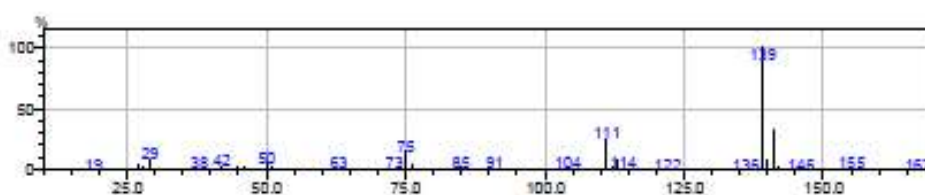

## Method

## [Comment]

==== Analytical Line 1 =====

[GC-2010]  
 Column Oven Temp. :100.0 °C  
 Injection Temp. :200.00 °C  
 Injection Mode :Split  
 Flow Control Mode :Pressure  
 Pressure :100.0 kPa  
 Total Flow :31.0 mL/min  
 Column Flow :1.33 mL/min  
 Linear Velocity :43.0 cm/sec  
 Purge Flow :3.0 mL/min  
 Split Ratio :20.0  
 High Pressure Injection :OFF  
 Carrier Gas Saver :OFF  
 Splitter Hold :OFF  
 Oven Temp. Program

| Rate  | Temperature(°C) | Hold Time(min) |
|-------|-----------------|----------------|
| -     | 100.0           | 3.00           |
| 10.00 | 250.0           | 0.00           |
| 10.00 | 300.0           | 1.00           |

## &lt; Ready Check Heat Unit &gt;

Column Oven : Yes  
 SPLI : Yes  
 MS : Yes

## &lt; Ready Check Detector(FTD/BID) &gt;

## &lt; Ready Check Baseline Drift &gt;

## &lt; Ready Check Injection Flow &gt;

SPLI Carrier : Yes  
 SPLI Purge : Yes

## &lt; Ready Check APC Flow &gt;

## &lt; Ready Check Detector APC Flow &gt;

External Wait : No  
 Equilibrium Time : 0.0 min

## [GC Program]

[GCMS-QP2010]  
 IonSourceTemp :200.00 °C  
 Interface Temp. :250.00 °C  
 Solvent Cut Time :3.50 min  
 Detector Gain Mode :Relative to the Tuning Result  
 Detector Gain :1.08 kV +0.00 kV  
 Threshold :50

## [MS Table]

—Group 1 - Event 1—

Start Time :4.00min

Figure S8. GC-MS Ethyl 2-((3-nitrobenzoyl)thio)acetate (II)

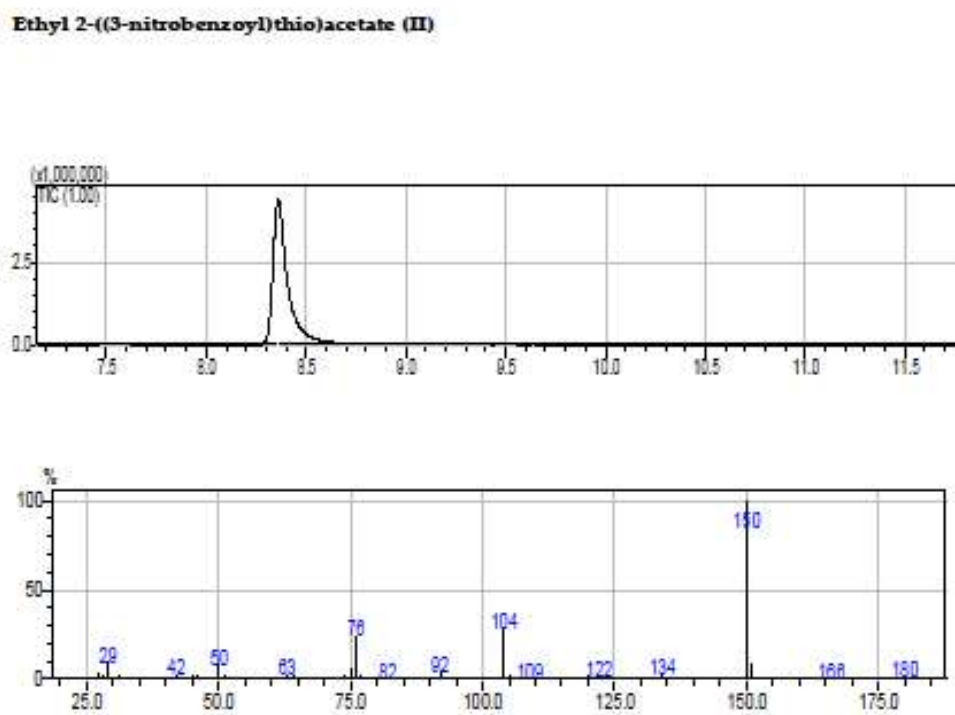

## Method

[Comment]

==== Analytical Line 1 =====

[GC-2010]

Column Oven Temp. :200.0 °C  
 Injection Temp. :200.00 °C  
 Injection Mode :Split  
 Flow Control Mode :Pressure  
 Pressure :100.0 kPa  
 Total Flow :21.8 mL/min  
 Column Flow :0.90 mL/min  
 Linear Velocity :36.6 cm/sec  
 Purge Flow :3.0 mL/min  
 Split Ratio :20.0  
 High Pressure Injection :OFF  
 Carrier Gas Saver :OFF  
 Splitter Hold :OFF

| Oven Temp. Program | Rate | Temperature(°C) | Hold Time(min) |
|--------------------|------|-----------------|----------------|
| -                  | -    | 200.0           | 2.00           |
| 5.00               | 5.00 | 300.0           | 2.00           |

&lt; Ready Check Heat Unit &gt;

Column Oven : Yes  
 SPLIT : Yes  
 MS : Yes

&lt; Ready Check Detector(FTD/STD) &gt;

&lt; Ready Check Baseline Drift &gt;

&lt; Ready Check Injection Flow &gt;

SPLIT Carrier : Yes  
 SPLIT Purge : Yes

&lt; Ready Check APC Flow &gt;

&lt; Ready Check Detector APC Flow &gt;

External Wait : No  
 Equilibrium Time : 0.0 min

[GC Program]

[GCMS-QP2010]

Figure S9. GC-MS Ethyl 2-((4-nitrobenzoyl)thio)acetate (III)

## Ethyl 2-((4-nitrobenzoyl)thio)acetate

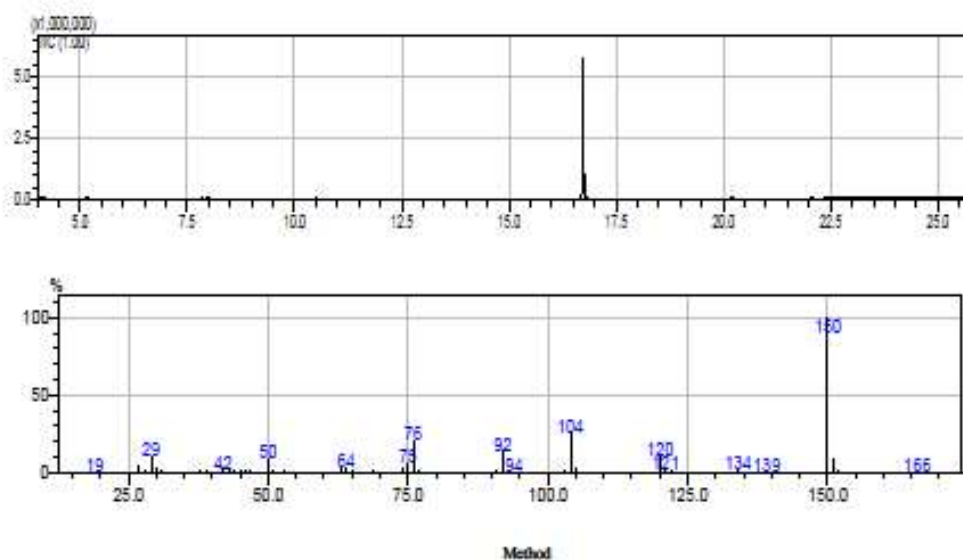

[Comment]

==== Analytical Line 1 =====

[GC-2010]

Column Oven Temp. :100.0 °C  
 Injection Temp. :200.00 °C  
 Injection Mode :Split  
 Flow Control Mode :Pressure  
 Pressure :100.0 kPa  
 Total Flow :31.0 mL/min  
 Column Flow :1.33 mL/min  
 Linear Velocity :43.0 cm/sec  
 Purge Flow :3.0 mL/min  
 Split Ratio :20.0  
 High Pressure Injection :OFF  
 Carrier Gas Sevier :OFF  
 Splitter Hold :OFF

Oven Temp. Program

| Rate  | Temperature(°C) | Hold Time(min) |
|-------|-----------------|----------------|
| -     | 100.0           | 2.00           |
| 10.00 | 250.0           | 0.00           |
| 10.00 | 300.0           | 7.00           |

&lt; Ready Check Heat Unit &gt;

Column Oven : Yes  
 SPL1 : Yes  
 MS : Yes

&lt; Ready Check Detector(FTD/BID) &gt;

&lt; Ready Check Baseline Drift &gt;

&lt; Ready Check Injection Flow &gt;

SPL1 Carrier : Yes  
 SPL1 Purge : Yes

&lt; Ready Check APC Flow &gt;

&lt; Ready Check Detector APC Flow &gt;

External Wait :No  
 Equilibrium Time :0.0 min

[GC Program]

[GCMS-QP2010]

IonSourceTemp :200.00 °C  
 Interface Temp. :250.00 °C  
 Solvent Cut Time :3.50 min  
 Detector Gain Mode :Relative to the Tuning Result  
 Detector Gain :1.08 kV +0.00 kV  
 Threshold :50

[MS Table]

Figure S10. IR Ethyl 2-((4-chlorobenzoyl)thio)acetate (I)

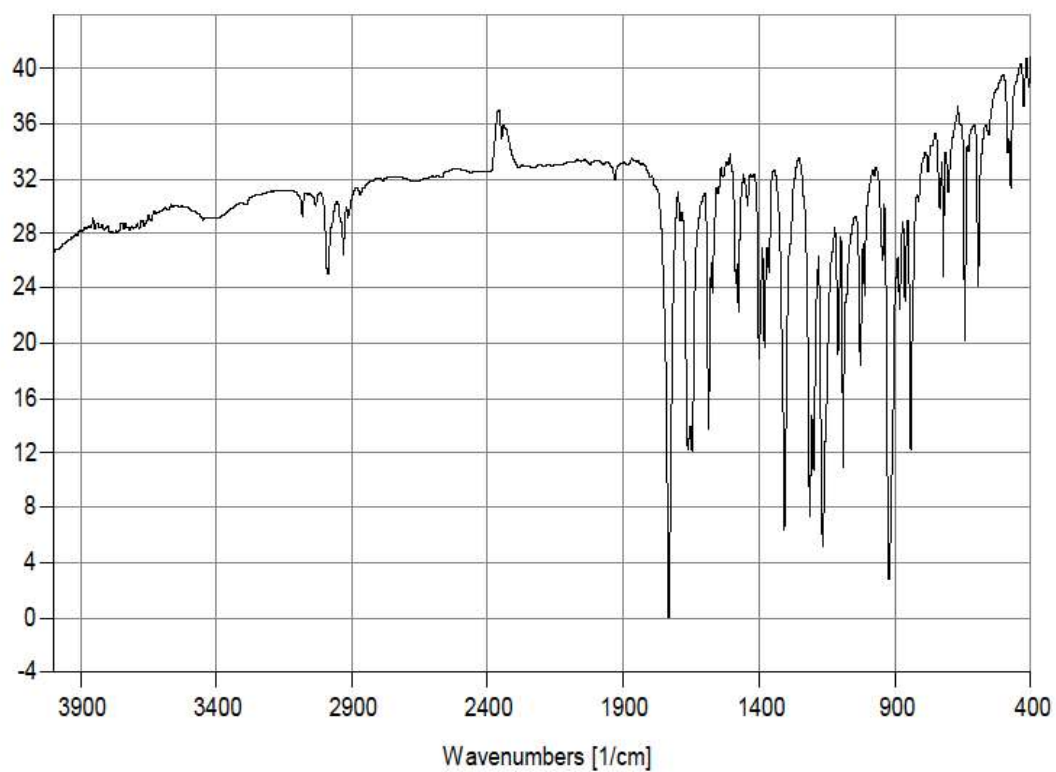

Figure S11. IR Ethyl 2-((3-nitrobenzoyl)thio)acetate (II)

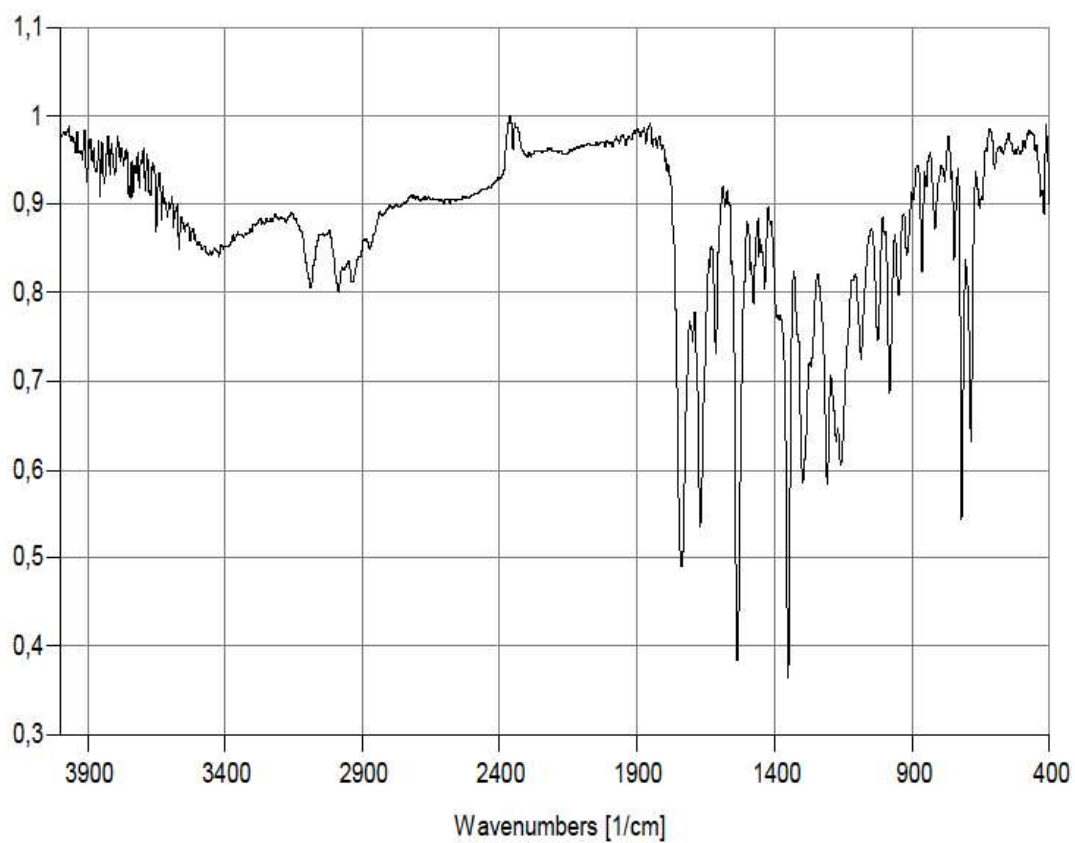



**Figure S12.** IR Ethyl 2-((4-nitrobenzoyl)thio)acetate (III)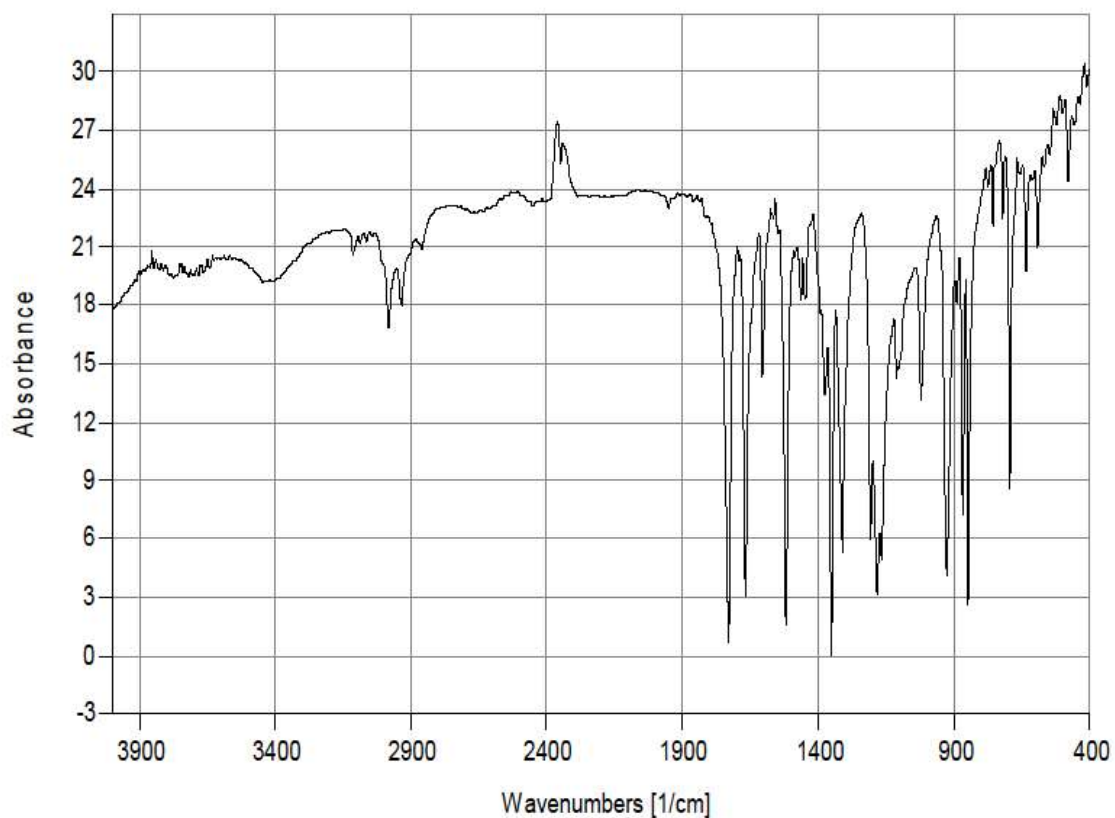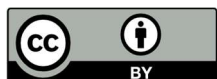

© 2019 by the authors. Licensee MDPI, Basel, Switzerland. This article is an open access article distributed under the terms and conditions of the Creative Commons Attribution (CC BY) license (<http://creativecommons.org/licenses/by/4.0/>).
